# Supplementary material
Source: ML conference proceedings conference paper supplement (https://proceedings.neurips.cc/paper_files/paper/2021/hash/7d62a275027741d98073d42b8f735c68-Abstract.html)
Supplement: Supplementary file 1 [file 7d62a275027741d98073d42b8f735c68-Supplemental.zip]

Archive with 4 entries (4 files):
- hnerf_presentation_720p.mp4
- __MACOSX/._hnerf_presentation_720p.mp4
- hnerf_supp_mat.pdf
- __MACOSX/._hnerf_supp_mat.pdf
